# Supplementary material
Source: ML conference proceedings conference paper supplement (https://proceedings.neurips.cc/paper_files/paper/2010/hash/f93882cbd8fc7fb794c1011d63be6fb6-Abstract.html)
Supplement: Supplementary file 1 [file f93882cbd8fc7fb794c1011d63be6fb6-Supplemental.zip]

Archive with 1 entries (1 files):
- extra/NIPS2010_1307_extra.pdf
